# Supplementary material for: A rare mutation (p.F149del) of the NT5C3A gene is associated with pyrimidine 5′-nucleotidase deficiency
Source: PubMed Central journal article supplement (PMC9700897; doi:10.1186/s11658-022-00405-w), 2022-11-24
Supplement: 11658_2022_405_MOESM4_ESM.pdf [file 11658_2022_405_MOESM4_ESM.pdf]

Supplementary raw WB data

CMBL\_Boguslawskaetal\_NT5C3A\_figure 3 D – uncroppedWB

Replicate 1

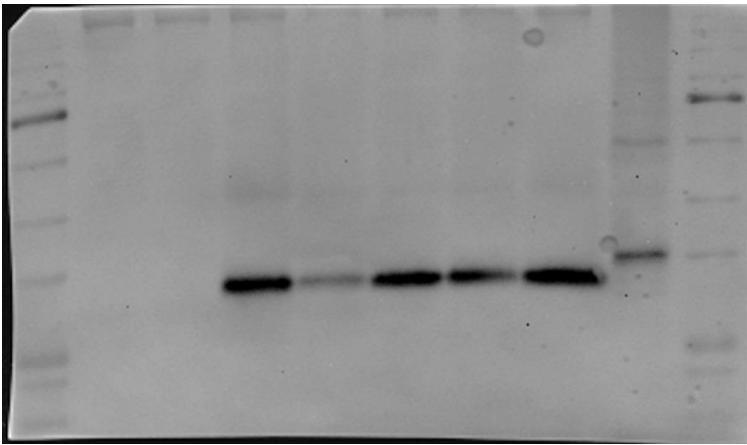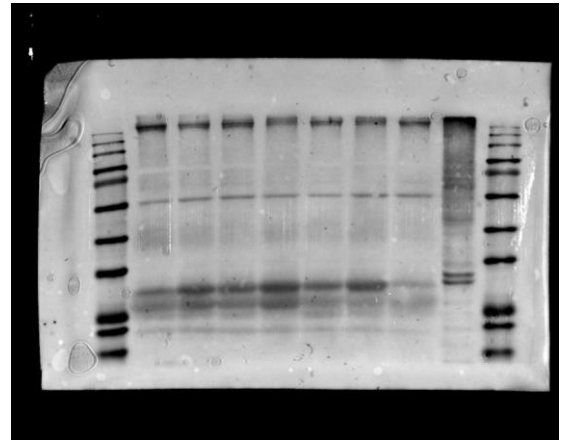

15.03.2018

12% gel, 1mm, 25 mA, 2h

1°Ab mouse anti-NT5C3 sc-390782 (SCBT, 1:1000), 60sec

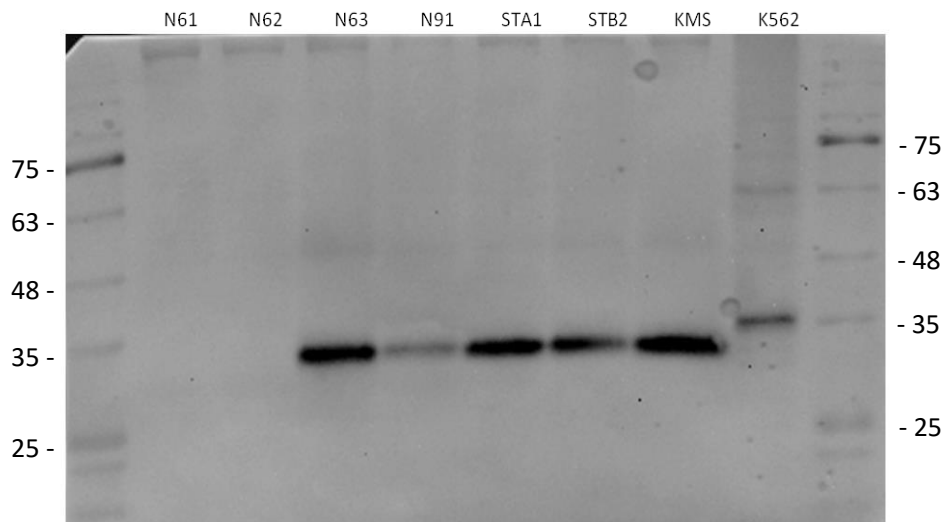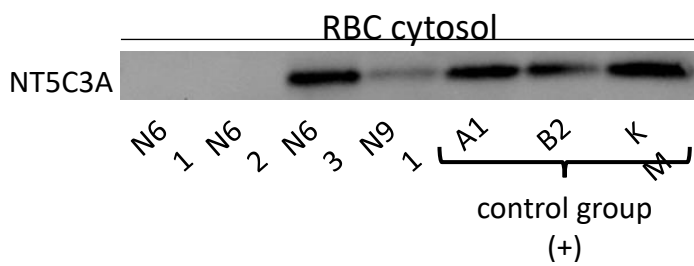

Replicate 2

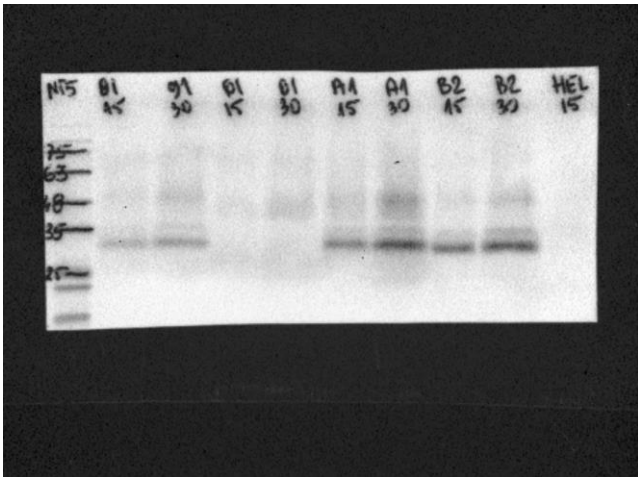

NT5C3A

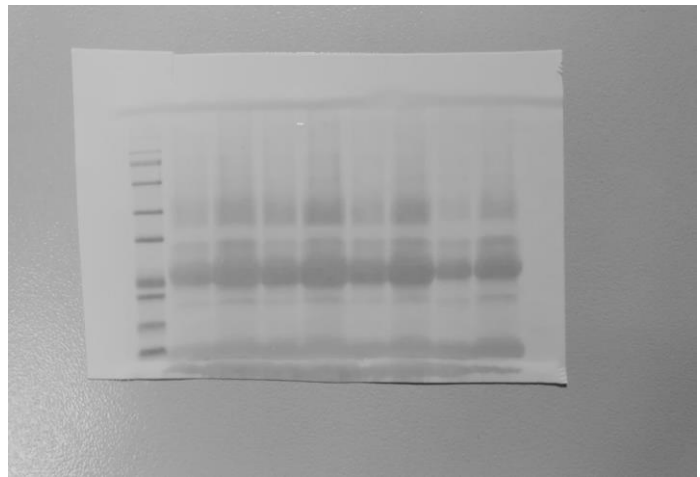

Total protein

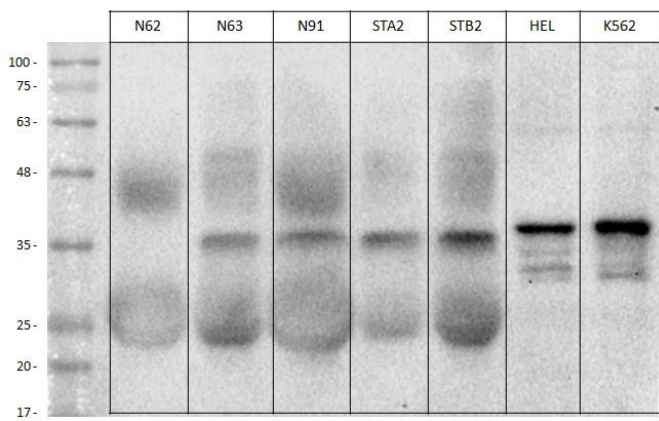

NT5C3A

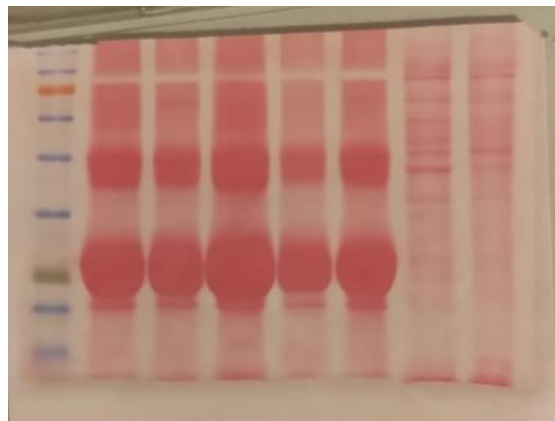

Total protein
